# Supplementary material
Source: PubMed Central journal article supplement (PMC8638401)
Supplement: ASN.2021070966SupplementaryData.pdf [file ASN.2021070966SupplementaryData.pdf]

**Supplemental Table of Contents:**

**Supplemental Figure 1:** Humoral immune responses and specific B cell immunity after third vaccination in KTR according to vaccine type

**Supplemental Figure 2:** SARS-CoV-2 vaccine specific T helper cell responses in KTx patients stratified according to heterologous/homologous third vaccination or specific IgC serostatus (humoral responder/non-responder)

**Supplemental Figure 3:** Detection of SARS-CoV-2 vaccine specific B cells

**Supplemental Figure 4:** Detection of SARS-CoV-2 vaccine specific T helper cells

# Supplemental Figure 1, Schrezenmeier, Rincon-Arevalo *et al*

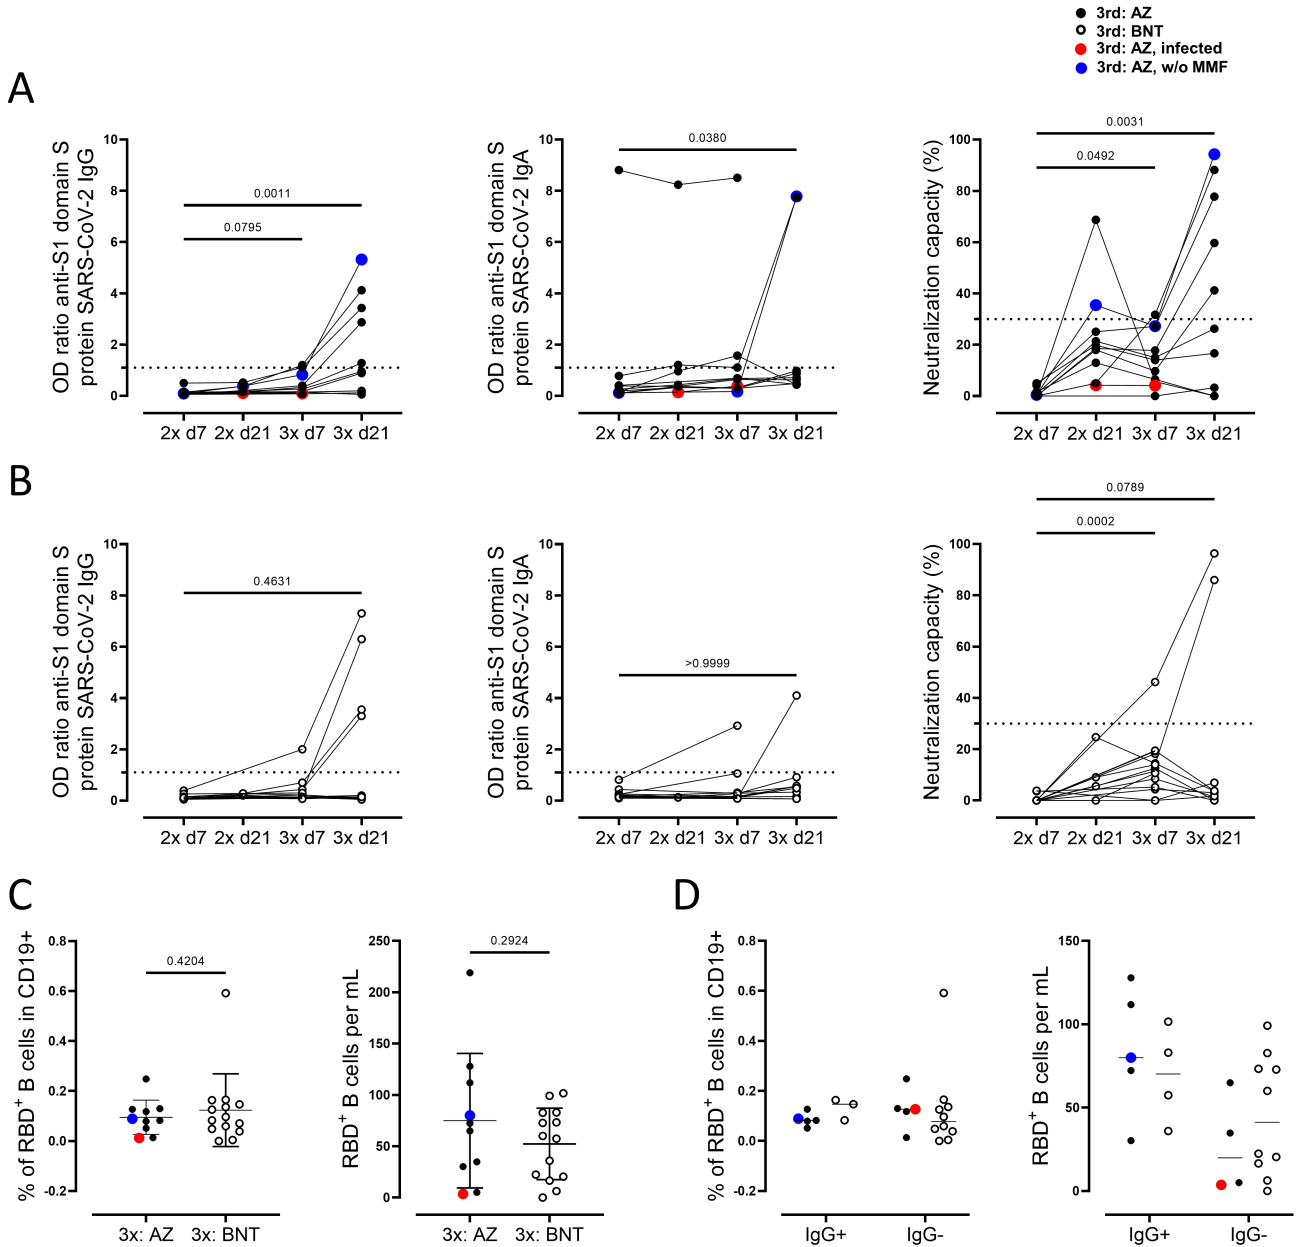

**Humoral immune responses and specific B cell immunity after third vaccination in KTR according to vaccine type.** Humoral vaccine-specific immune responses were assessed by ELISA for anti-spike protein S1 IgG (left), spike protein S1 IgA (center) and virus neutralization by a blocking ELISA (right) at the indicated timepoints in KTR after administration of a third dose of either ChAdOx1 (A, n=11, black filled dots) or BNT162b2 (B, n=14, back empty dots). Thresholds defining a positive response are indicated by dotted lines. Relative frequencies (left) and absolute counts (right) of RBD-specific CD19<sup>+</sup> B cells in all patients (D) as well as in responders IgG<sup>+</sup> and non-responders IgG<sup>-</sup> 7 ± 2 days after third vaccination with ChAdOx1 or BNT162b2. (A-C) Kruskal-Wallis with Dunn's post-test. (D) Two way ANOVA test with Šídák post-test. The infected individual is depicted in red. (D, E) Mann-Whitney test.

# Supplemental Figure 2, Schrezenmeier, Rincon-Arevalo *et al*

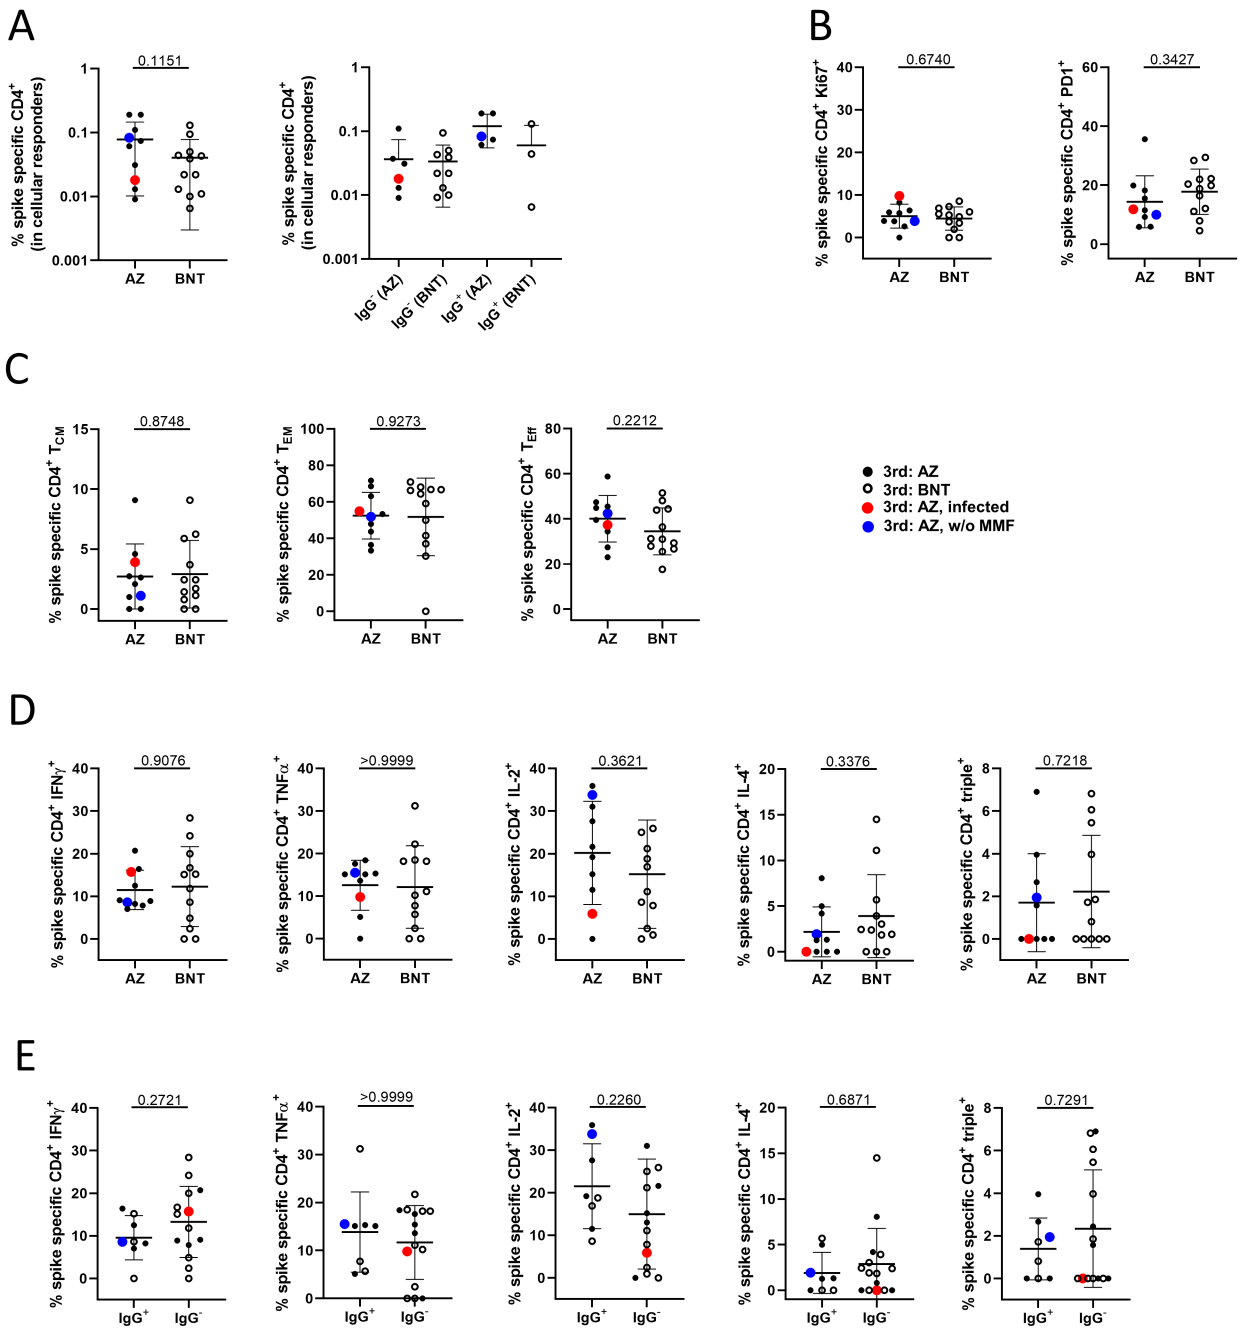

**SARS-CoV-2 vaccine specific T helper cell responses in KTx patients stratified according to heterologous/homologous third vaccination or specific IgG serostatus (humoral responder/non-responder).** PBMC of KTx patients were stimulated or not with spike peptide mix. Specific CD4<sup>+</sup> T cells were identified and quantified 7±2 days after the third vaccination (AZ or BNT, as indicated) by FACS according to CD137 and CD154 co-expression. Depicted are (A) frequencies of specific CD4<sup>+</sup> T cells (left, unpaired t test) and frequencies within humoral responders (anti-S1 IgG<sup>+</sup>) and non-responders (anti-S1 IgG<sup>-</sup>) (right, not tested for significance due to low patient numbers/group). (B) Frequencies of antigen-specific CD4<sup>+</sup> T cells expressing Ki67 (left, unpaired Mann-Whitney) or PD1 (right, unpaired t test). (C) Memory/effector subset differentiation of spike-reactive CD4<sup>+</sup> T cells (T<sub>CM</sub>: left, unpaired t test; T<sub>EM</sub>: middle, unpaired t test; T<sub>EF</sub>: right, unpaired t test). (D) Expression of IFN $\gamma$ , TNF $\alpha$  (both unpaired Mann-Whitney), IL-2 (unpaired t test) and IL-4 (unpaired Mann-Whitney) in antigen-specific T cells including analysis of IFN $\gamma$ <sup>+</sup>TNF $\alpha$ <sup>+</sup>IL-2<sup>+</sup> “triple<sup>+</sup>” polyfunctional (unpaired Mann-Whitney) cells. (E) Cytokine profile in patients stratified according to humoral response or not. Expression of IFN $\gamma$  (unpaired t test) TNF $\alpha$  (unpaired Mann-Whitney), IL-2 (unpaired t test) and IL-4 (unpaired Mann-Whitney) in antigen-specific T cells including analysis of IFN $\gamma$ <sup>+</sup>TNF $\alpha$ <sup>+</sup>IL-2<sup>+</sup> “triple<sup>+</sup>” polyfunctional (unpaired Mann-Whitney) cells. Where applicable, graphs show means ± SD.

# Supplemental Figure 3, Schrezenmeier, Rincon-Arevalo *et al*

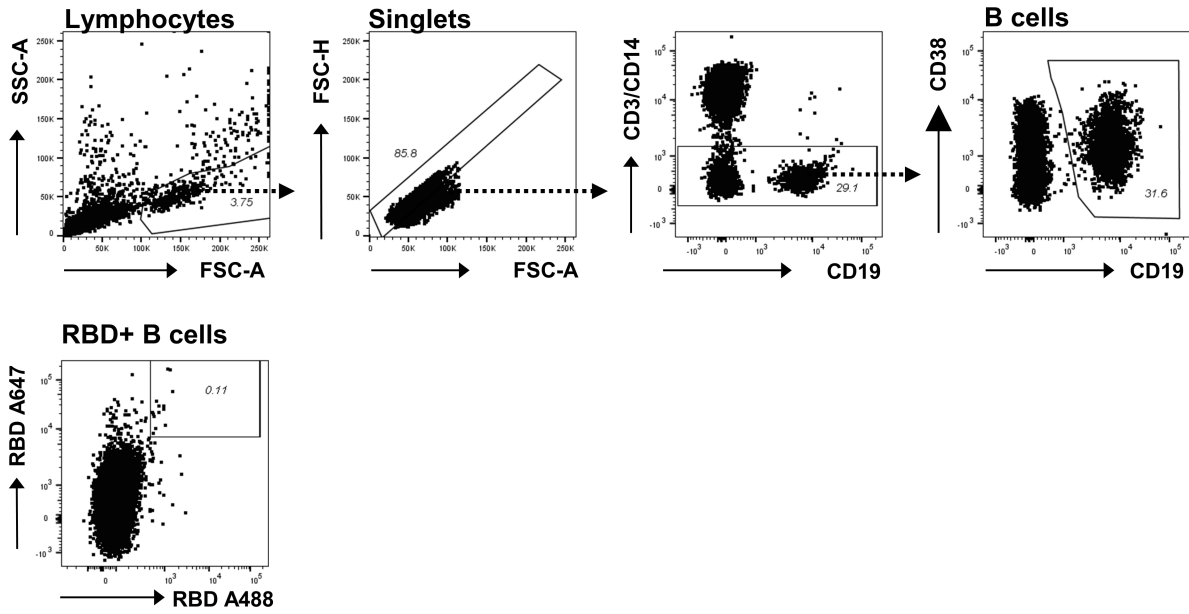

**Detection of SARS-CoV-2 vaccine specific B cells.** B cells in PBMCs were detected by flow cytometry. Antigen-specific B cells were identified by double staining with recombinant purified RBD (DAGC149, Creative Diagnostics, New York, USA) conjugated to AF647 or AF488, respectively.

# Supplemental Figure 4, Schrezenmeier, Rincon-Arevalo *et al*

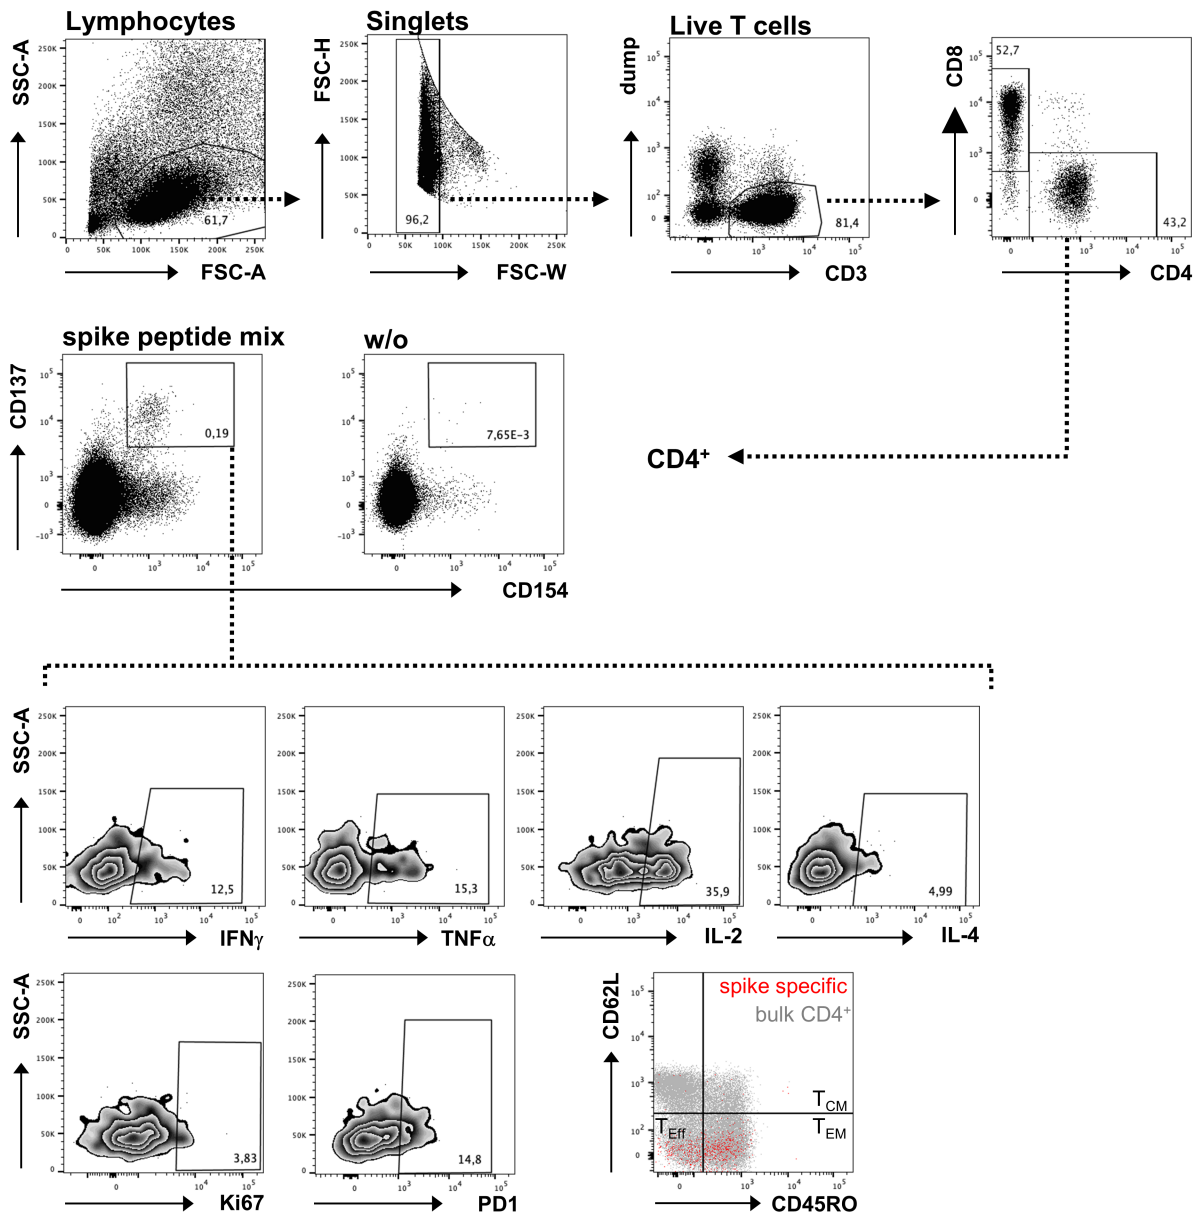

**Detection of SARS-CoV-2 vaccine specific T helper cells.** PBMC were stimulated or not with SARS-CoV-2 spike overlapping peptide mix for 16 h. Antigen-specific live single CD14<sup>-</sup>CD19<sup>-</sup>CD3<sup>+</sup> (“dump” negative) specific CD4<sup>+</sup> Th cells were detected by FACS according to co-expression of CD137 and CD154. Specific cells were subsequently analyzed for expression of IFN $\gamma$ , TNF $\alpha$ , IL-2 and/or IL-4, characterized for expression of the activation-related markers Ki67 and PD1, or for their memory phenotype based on CD45RO and CD62L expression (T<sub>CM</sub>: central memory-, T<sub>EM</sub>: effector memory, T<sub>eff</sub>: effector-T cells). Gates for cytokines or activation-induced molecules were set according to the respective unstimulated or unstained controls, respectively.
